# Supplementary material
Source: PubMed Central journal article supplement (PMC4168015)
Supplement: NIHMS620419-supplement-supplement_1.pdf [file NIHMS620419-supplement-supplement_1.pdf]

### ***Purification of His<sub>6</sub>-Cks1 from E. coli***

pGEX-4T-1 vector containing GST-Thrombin-His<sub>6</sub>-TEV-Cks1 was used to purify recombinant Cks1. BL21 *E. coli* cells were used to generate recombinant protein. The cells were lysed by sonication in Buffer A (50 mM Tris pH 7.4, 200 mM NaCl, 2.5 mM PMSF, 5 mM DTT). Cleared lysate was allowed to bind to 500 µg of glutathione-charged sepharose beads (Amersham Biosciences). After 5 washes in Buffer A with 500 mM NaCl, GST-His<sub>6</sub>-Cks1 was eluted with 10 mM glutathione. 10 Units of thrombin per 1 mg of GST-Cks1 were added for overnight cleavage at 4°C in Buffer A in the presence of 2.5 mM of CaCl<sub>2</sub>. The mixture was loaded onto a glutathione column to remove cleaved GST and uncut GST-Cks1. His<sub>6</sub>-Cks1 was separated from thrombin by running the mixture through a Ni-NTA column and eluted with imidazole. A Superdex 75 gel filtration column was used to exchange His<sub>6</sub>-Cks1 into a suitable storage buffer (150 mM NaCl, 1mM DTT, 50 mM Tris pH 7.5). SDS-PAGE followed by Coomassie blue staining was carried out to determine the concentration and purity of protein. The overall yield was 10 mg from 4 liters of bacterial culture.

### ***Expression and Purification of GST-Skp2/Skp1 from E. coli***

The plasmid was transformed into *E. coli* BL21 and grown in LB at 37 °C to an OD<sub>600</sub> of 1.0. IPTG was added to a working concentration of 1 mM, and the bacterial culture was induced for 20 hours at 16°C. Cells were harvested by centrifugation and lysed by sonication in 50 mM Tris-HCl (pH 7.6), 200 mM NaCl, 2.5 mM PMSF, and 5 mM DTT. 10 mL of lysis buffer was used for each liter of culture. The clarified lysate was incubated with glutathione beads for 2 hours at 4°C. The beads were transferred into a gravity column and washed with 20 CV of the lysis buffer. The GST-Skp2/Skp1 complex was eluted with 10 mM reduced glutathione in 50 mM Tris-HCl

(pH 8.0), 200 mM NaCl, and 5 mM DTT. This was followed by anion exchange chromatography using a 30 mL Q-Sepharose fast flow (Sigma) gravity column. After washing the column with 10 CV of low salt buffer (25 mM Tris-HCl pH 7.6, 50 mM NaCl, 5 mM DTT), the sample was applied to the column. The column was washed again with 20 CV of low-salt buffer, and the protein was eluted using a gradient of low-to-high salt (25 mM Tris-HCl pH 7.6, 400 mM NaCl, 5 mM DTT). The purification scheme was finished by buffer exchange through a 120 mL Superdex 200 size exclusion column on an AKTA FPLC system, using a storage buffer (50 mM Tris-HCl pH 7.6, 200 mM NaCl, 5 mM DTT). The fractions containing the purified complex were pooled, concentrated to 5  $\mu\text{g}/\mu\text{L}$ , and rapidly frozen in liquid nitrogen. The yield was 4 mg of protein per liter of *E. coli* culture.

### ***Western Blotting***

For western blot analysis, total protein extracts were prepared by lysing Kip16 cells in lysis buffer (50 mM Tris-HCl (pH 8.0), 5 mM EDTA, 150 mM NaCl, 1% NP-40, 0.1% SDS, and 1 mM phenylmethylsulfonyl fluoride). 50  $\mu\text{g}$  of total soluble proteins were separated by SDS-PAGE. Proteins were transferred to nitrocellulose membrane and the membrane was blocked for 1 hour with 4% nonfat milk, followed by overnight incubation at 4°C with primary antibodies against p27 (1:1000, Santa Cruz, SC-53871) and Ezrin (1:5000, Sigma, E-8897), whose expression was used as a loading control. Membranes were then incubated with peroxidase-conjugated secondary antibodies for one hour at room temperature. Detection was performed using Super Signal WestDura Substrate (Thermo Scientific).

## SUPPLEMENTARY FIGURE LEGENDS

**Supplementary Fig. 1.** Detection of specific GST-Skp2/Skp1 and His<sub>6</sub>-Cks1 interaction *in vitro*. 50 nM GST-Skp2/Skp1 was incubated with 125 nM Cks1 for 1 hour in AlphaScreen reaction buffer. A mixture of donor/acceptor beads was added into each well to a final concentration of 20 µg/mL in a reaction volume of 25 µL. After 2 hours of incubation, the 384-well plate was read on an Envision plate reader from PerkinElmer. Data are presented as mean +/- SD. Each experiment was performed in triplicates. A robust signal is generated upon GST-Skp2/Skp1-His<sub>6</sub>-Cks1 interactions (bar 1). Equimolar addition of Skp1 does not affect Skp2-Cks1 binding activity (bar 2). AlphaScreen signal is significantly reduced when GST-Skp2/Skp1 is replaced with GST alone (bar 3), or when one of the reagents is omitted (donor beads, acceptor beads, GST-Skp2/Skp1, His<sub>6</sub>-Cks1 – bars 4, 5, 6, 7, respectively).

**Supplementary Fig. 2.** Correlation of two independent AlphaScreen runs and corresponding statistical parameters. (A) Table of results that show statistical parameters Z', S/B ratio, and the number of hits identified in the screen. (B) Correlation plot of 1,600 compounds identified from runs 1 and 2 expressed as percent activity. Forty five hits, that were positive for both runs, were identified.

**Supplementary Fig. 3.** Immunoblotting of GFP-p27 from cell lysates prepared from the mink lung epithelial cell line Kip16<sup>28</sup> using an anti-p27 antibody (Santa Cruz). Kip16 cells were incubated with 1 µM MG132 or NSC689857 or NSC681152 (0.1 µM, 1 µM, 2.5 µM and 5 µM) as indicated for 24 hours, and the cell extracts were resolved on SDS-PAGE followed by detection with p27 antibodies. The expression of ezrin was used as loading control.

**Supplementary Fig. 4.** Results of NCI 60 cell screens using NSC689857 and NSC681152. The results were downloaded from the DTP website (<http://dtp.nci.nih.gov/>).

**Supplementary Fig. 5.** Counterscreen of hits identified by the primary screen. (A) The effects of 45 hits on a biotinylated GST control that artificially brings donor and acceptor beads together. The compounds were identified by their NSC numbers. 0.5 nM of biotinylated GST and a mixture of donor/acceptor beads (20  $\mu$ g/ml final concentration) were added into each well in a reaction volume of 25  $\mu$ l with 10  $\mu$ M of each compound. (B) The effect of NSC689857 and its analogs on a biotinylated GST control that artificially brings donor and acceptor beads together. Data are presented in mean  $\pm$  SD form. Each experiment was done in triplicates.

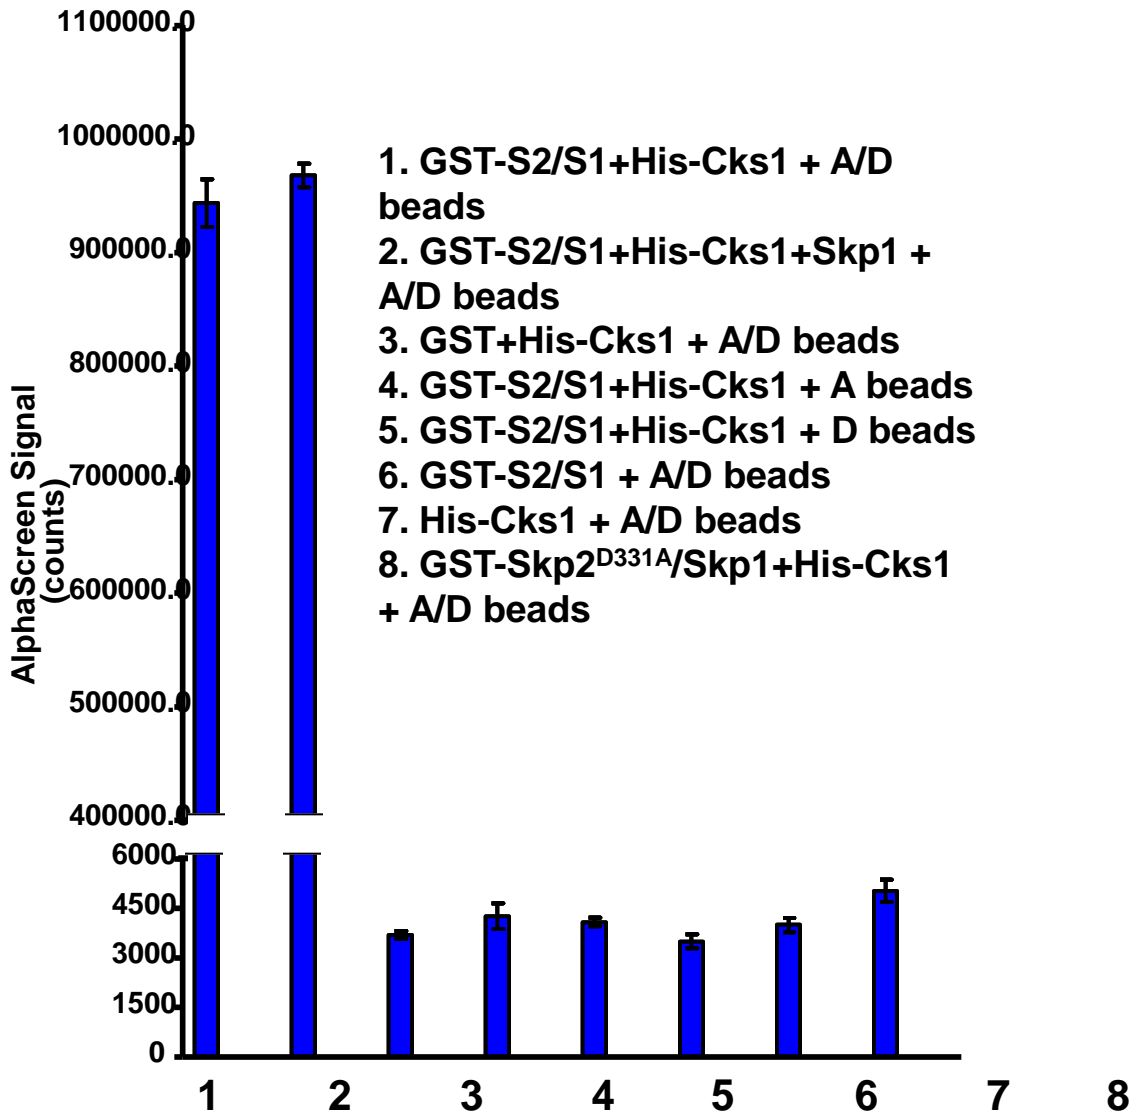

**A.**

| Plate number | 1    | 2    | 3    | 4    | 5    |
|--------------|------|------|------|------|------|
| Z' trial 1   | 0.66 | 0.59 | 0.59 | 0.67 | 0.69 |
| Z' trial 2   | 0.76 | 0.70 | 0.72 | 0.61 | 0.59 |
| S/B trial 1  | 16   | 19   | 18   | 22   | 21   |
| S/B trial 2  | 18   | 18   | 18   | 18   | 18   |
| Hits         | 14   | 25   | 29   | 8    | 14   |

**B.**

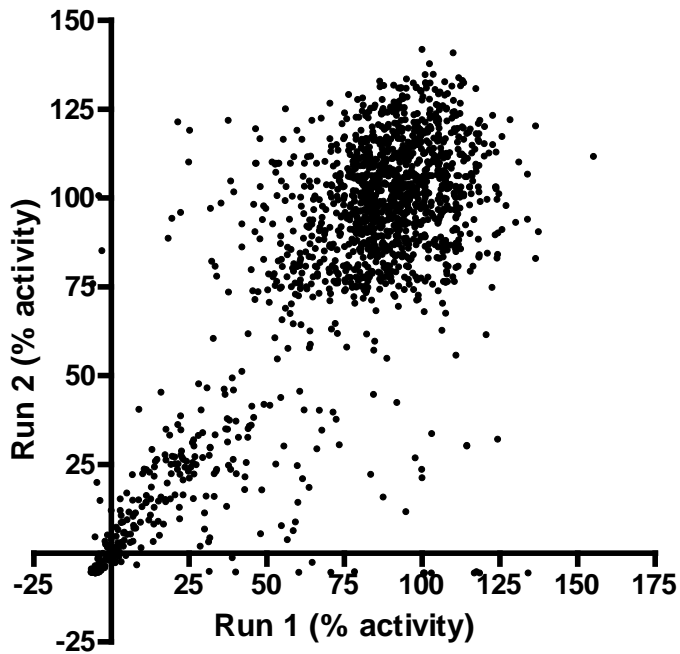

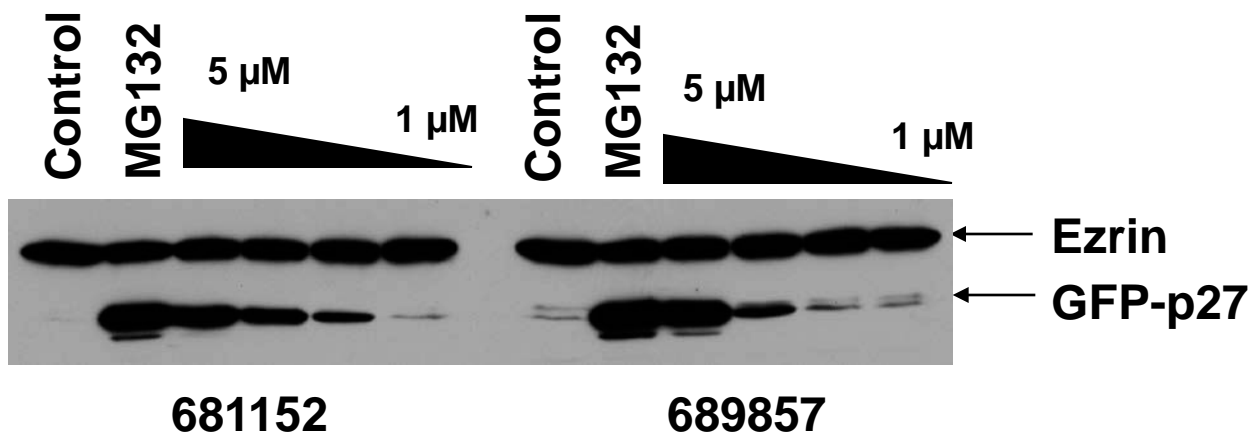

# GI<sub>50</sub> Mean Graph for Compound 689857

NCI Cancer Screen Current Data

Average GI<sub>50</sub> over all cell lines is 1.25E-6 M

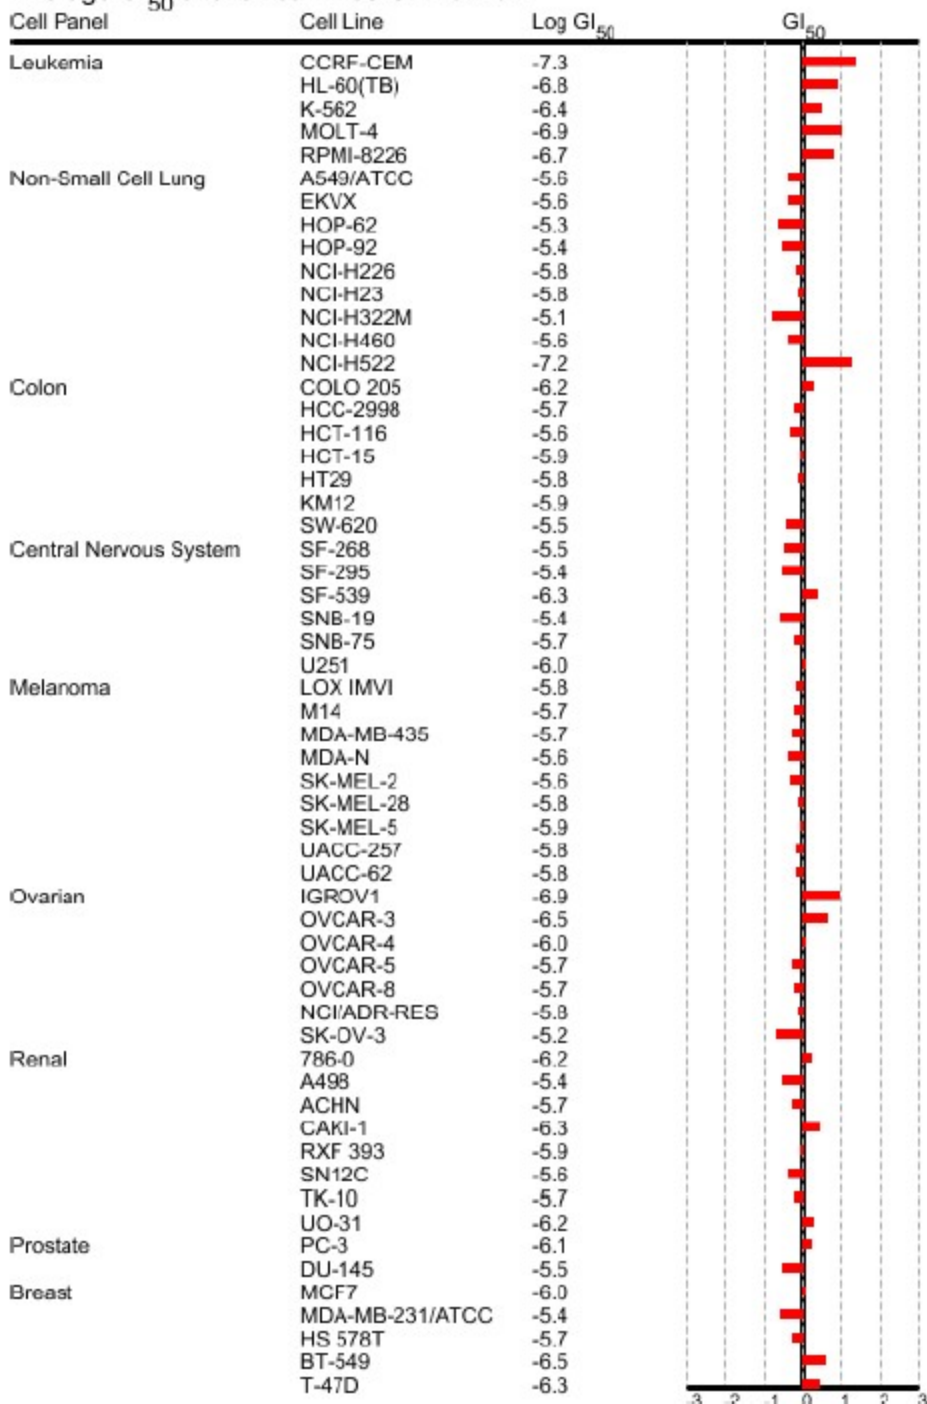





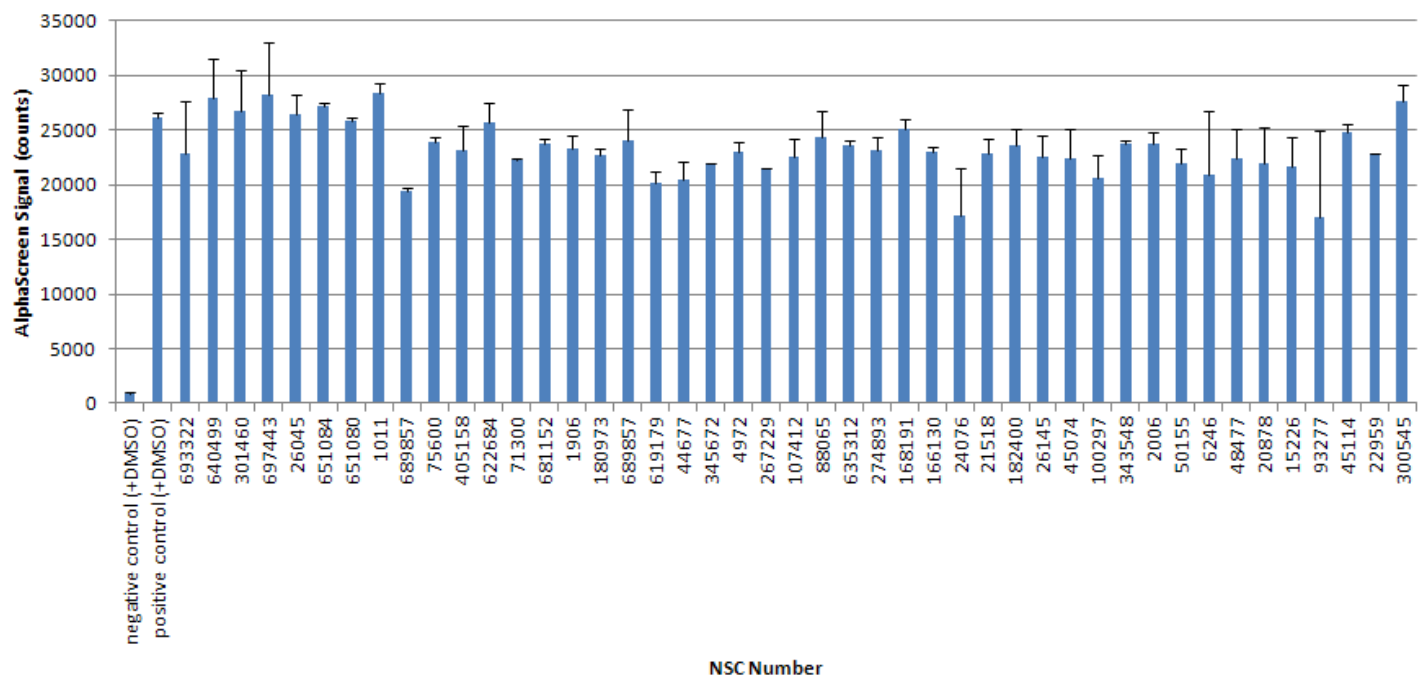

Supplemental Figure 5A

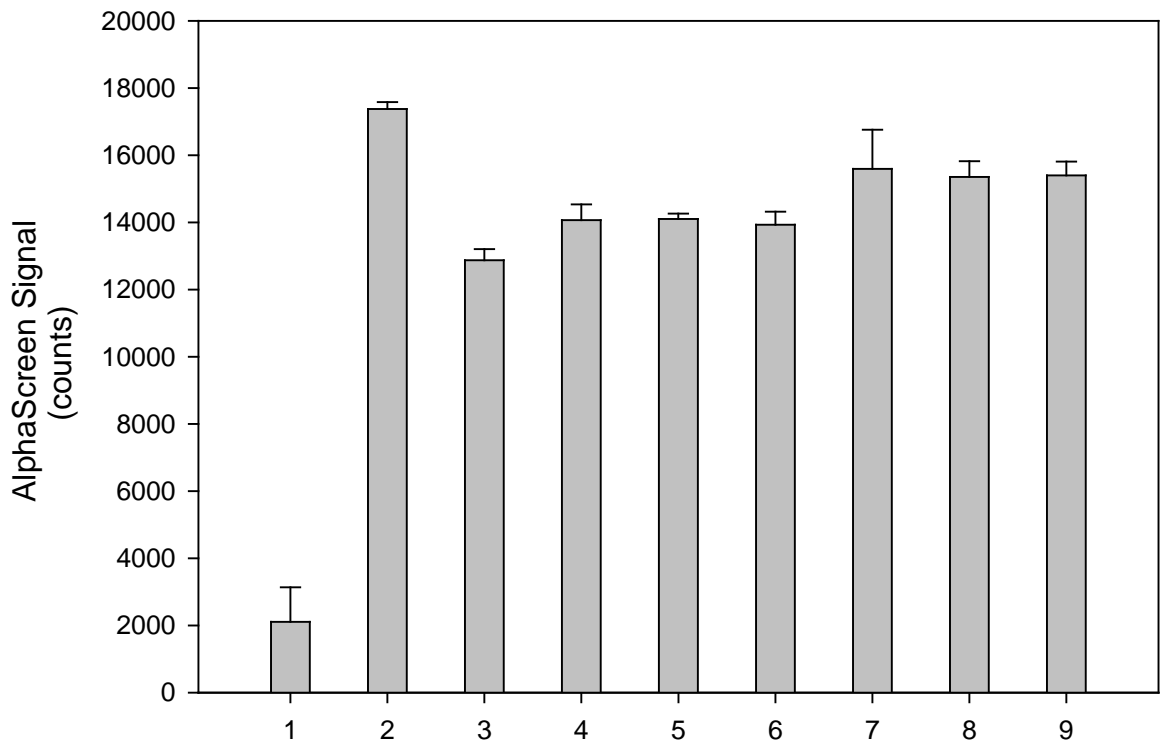

- 1: A/D beads
- 2: Biotinylated-GST + A/D beads
- 3: 857 + Biotinylated-GST + A/D beads
- 4: Q857 + Biotinylated-GST + A/D beads
- 5: A857 + Biotinylated-GST + A/D beads
- 6: E857 + Biotinylated-GST + A/D beads
- 7: MHQ + Biotinylated-GST + A/D beads
- 8: BQ + Biotinylated-GST + A/D beads
- 9: NSC681152 + Biotinylated-GST + A/D beads
